# Supplementary material
Source: Royal Society of Chemistry journal article supplement (doi:10.1039/d6nr01211f)
Supplement: d6nr01211f1.pdf [file d6nr01211f1.pdf]

# 1 Supporting Information

## 2 Engineered MXene as An Analytical Tool for Health Risk Assessment of 3 Heavy Metals

4 Saman Bagheri,<sup>1†</sup> Ghazal Rabiee,<sup>2†</sup> Mohammad Behbahani<sup>3\*\*†</sup>

5 <sup>1</sup> *Department of Inorganic Chemistry, Faculty of Chemistry and Petroleum Sciences, Shahid*  
6 *Beheshti University, Tehran, 1983969411, Iran*

7 <sup>2</sup> *School of Chemistry, College of Science, University of Tehran, Tehran, 1417935840, Iran*

8 <sup>3</sup>*Department of Chemistry, Faculty of Science, Shahid Chamran University of Ahvaz, Ahvaz,*  
9 *6135783151, Iran*

10 † All authors have contributed equally

11

12

13

14

15

16

17

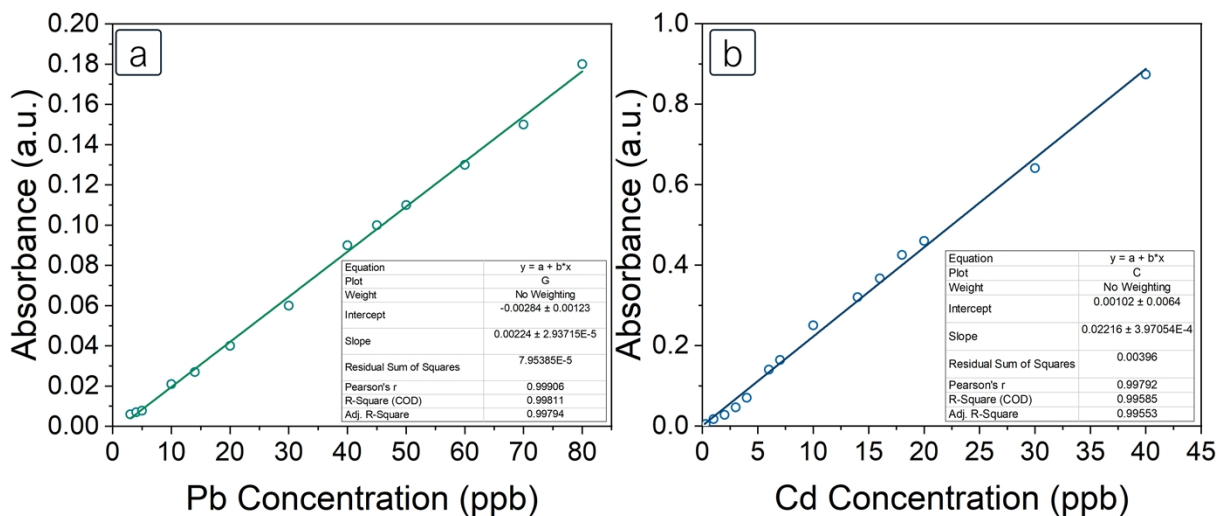

**Figure S1.** Analytical calibration curves for (a) cadmium and (b) lead ions.

**Table S1** Determination of cadmium and lead ions in certified reference materials

| Sample                    | Element         | Certified concentration (mg Kg <sup>-1</sup> ) | Found (mg Kg <sup>-1</sup> ) (Mean ± tS/N <sup>1/2</sup> )<br>N=2, Pr=0.05 | Relative error (%) |
|---------------------------|-----------------|------------------------------------------------|----------------------------------------------------------------------------|--------------------|
| Taiwan Clay Soil (CRM046) | Cd <sup>a</sup> | 7.01                                           | 7.18±0.47                                                                  | 2.43               |
|                           | Pb <sup>b</sup> | 45.3                                           | 45.55±0.37                                                                 | 0.55               |

<sup>a</sup> Traceable to NIST SRM 3108 Lot 060531

<sup>b</sup> Traceable to NIST SRM 3128 Lot 030721
